# Supplementary material for: Tysonite type Gd1−yCayF3−y solid solution: hydrothermal synthesis and luminescence properties
Source: Royal Society of Chemistry journal article supplement (doi:10.1039/c3ce41598h), 2013-01-01
Supplement: c3ce41598h.pdf [file c3ce41598h.pdf]

## **Electronic Supplementary Information (ESI)**

### Tysonite type $\text{Gd}_{1-y}\text{Ca}_y\text{F}_{3-y}$ solid solution: hydrothermal synthesis and luminescence properties

Qi Zhao,<sup>ab</sup> Baiqi Shao,<sup>ab</sup> Wei Lü,<sup>a</sup> Yongchao Jia,<sup>ab</sup> Wenzhen Lv,<sup>ab</sup> Mengmeng Jiao<sup>ab</sup>, and Hongpeng You<sup>\*a</sup>

<sup>a</sup>State Key Laboratory of Rare Earth Resource Utilization, Changchun Institute of Applied Chemistry, Chinese Academy of Sciences, Changchun 130022, P. R. China.

<sup>b</sup>University of the Chinese Academy of Sciences, Beijing 100049, P. R. China.

\*Corresponding author: E-mail address: [hpyou@ciac.ac.cn](mailto:hpyou@ciac.ac.cn)

|                                      | <b>GdCl<sub>3</sub><br/>(1 mol·L<sup>-1</sup>)<br/>(mL)</b> | <b>CaCl<sub>2</sub><br/>(1 mol·L<sup>-1</sup>)<br/>(mL)</b> | <b>Ethylene<br/>glycol (mL)</b> | <b>Deionized water<br/>(mL)</b> |   | <b>Sodium<br/>fluoborate<br/>(g)</b> | <b>Time/Temperature<br/>(°C/h)</b> |
|--------------------------------------|-------------------------------------------------------------|-------------------------------------------------------------|---------------------------------|---------------------------------|---|--------------------------------------|------------------------------------|
| Typical sample                       |                                                             |                                                             |                                 |                                 |   |                                      |                                    |
| 1                                    | 1                                                           | 1                                                           | 20                              | 10                              | 8 | 1.5                                  | 160/6                              |
| Effect of the ethylene glycol        |                                                             |                                                             |                                 |                                 |   |                                      |                                    |
| 2                                    | 1                                                           | 1                                                           | 0                               | 30                              | 8 | 0.15                                 | 160/6                              |
| 3                                    | 1                                                           | 1                                                           | 10                              | 20                              | 8 | 0.15                                 | 160/6                              |
| 4                                    | 1                                                           | 1                                                           | 15                              | 15                              | 8 | 0.15                                 | 160/6                              |
| 5                                    | 1                                                           | 1                                                           | 25                              | 5                               | 8 | 0.15                                 | 160/6                              |
| 6                                    | 1                                                           | 1                                                           | 30                              | 0                               | 8 | 0.15                                 | 160/6                              |
| Effect of the calcium amount         |                                                             |                                                             |                                 |                                 |   |                                      |                                    |
| 7                                    | 1                                                           | 0                                                           | 20                              | 11                              | 8 | 0.15                                 | 160/6                              |
| 8                                    | 1                                                           | 0.2                                                         | 20                              | 10.8                            | 8 | 0.15                                 | 160/6                              |
| 9                                    | 1                                                           | 0.4                                                         | 20                              | 10.6                            | 8 | 0.15                                 | 160/6                              |
| 10                                   | 1                                                           | 0.8                                                         | 20                              | 10.2                            | 8 | 0.15                                 | 160/6                              |
| 11                                   | 1                                                           | 1.5                                                         | 20                              | 9.5                             | 8 | 0.15                                 | 160/6                              |
| 12                                   | 1                                                           | 2                                                           | 20                              | 9                               | 8 | 0.15                                 | 160/6                              |
| Effect of the fluorine amount        |                                                             |                                                             |                                 |                                 |   |                                      |                                    |
| 13                                   | 1                                                           | 1                                                           | 20                              | 10                              | 8 | 0.055                                | 160/6                              |
| 14                                   | 1                                                           | 1                                                           | 20                              | 10                              | 8 | 0.11                                 | 160/6                              |
| 15                                   | 1                                                           | 1                                                           | 20                              | 10                              | 8 | 0.22                                 | 160/6                              |
| Effect of the reagents concentration |                                                             |                                                             |                                 |                                 |   |                                      |                                    |
| 16                                   | 0.3                                                         | 0.3                                                         | 20                              | 11.4                            | 8 | 0.05                                 | 160/6                              |
| 17                                   | 0.5                                                         | 0.5                                                         | 20                              | 11                              | 8 | 0.075                                | 160/6                              |
| 18                                   | 2                                                           | 2                                                           | 20                              | 8                               | 8 | 0.3                                  | 160/6                              |
| 19                                   | 3                                                           | 3                                                           | 20                              | 6                               | 8 | 0.45                                 | 160/6                              |
| Effect of the time                   |                                                             |                                                             |                                 |                                 |   |                                      |                                    |
| 20                                   | 1                                                           | 1                                                           | 20                              | 10                              | 8 | 1.5                                  | 160/0.5                            |
| 21                                   | 1                                                           | 1                                                           | 20                              | 10                              | 8 | 1.5                                  | 160/2                              |
| 22                                   | 1                                                           | 1                                                           | 20                              | 10                              | 8 | 1.5                                  | 160/8                              |
| 23                                   | 1                                                           | 1                                                           | 20                              | 10                              | 8 | 1.5                                  | 160/24                             |
| Effect of the temperature            |                                                             |                                                             |                                 |                                 |   |                                      |                                    |
| 24                                   | 1                                                           | 1                                                           | 20                              | 10                              | 8 | 1.5                                  | 120/6                              |
| 25                                   | 1                                                           | 1                                                           | 20                              | 10                              | 8 | 1.5                                  | 140/6                              |
| 26                                   | 1                                                           | 1                                                           | 20                              | 10                              | 8 | 1.5                                  | 180/6                              |
| 27                                   | 1                                                           | 1                                                           | 20                              | 10                              | 8 | 1.5                                  | 200/6                              |
| Luminescence properties              |                                                             |                                                             |                                 |                                 |   |                                      |                                    |
| 28<br>2%                             | Gd 0.98<br>Tb 0.02                                          | 1                                                           | 20                              | 10                              | 8 | 1.5                                  | 160/6                              |
| 29<br>2%                             | Gd 0.98<br>Dy 0.02                                          | 1                                                           | 20                              | 10                              | 8 | 1.5                                  | 160/6                              |
| 30<br>5%                             | Gd 0.95<br>Eu 0.05                                          | 1                                                           | 20                              | 10                              | 8 | 1.5                                  | 160/6                              |

|                         | <b>GdCl<sub>3</sub><br/>(1 mol·L<sup>-1</sup>)<br/>(mL)</b> | <b>CaCl<sub>2</sub><br/>(1 mol·L<sup>-1</sup>)<br/>(mL)</b> | <b>Ethylene<br/>glycol (mL)</b> | <b>Deionized water<br/>(mL)</b> | <b>Sodium<br/>fluoborate<br/>(g)</b> | <b>Time/Temperature<br/>(°C/h)</b> |       |
|-------------------------|-------------------------------------------------------------|-------------------------------------------------------------|---------------------------------|---------------------------------|--------------------------------------|------------------------------------|-------|
| Luminescence properties |                                                             |                                                             |                                 |                                 |                                      |                                    |       |
| 31<br>0.1%              | Gd 0.999<br>Eu 0.02 (0.05<br>mol·L <sup>-1</sup> )          | 1                                                           | 20                              | 9.981                           | 8                                    | 1.5                                | 160/6 |
| 32<br>0.5%              | Gd 0.995<br>Eu 0.1 (0.05<br>mol·L <sup>-1</sup> )           | 1                                                           | 20                              | 9.905                           | 8                                    | 1.5                                | 160/6 |
| 33<br>1%                | Gd 0.99<br>Eu 0.2 (0.05<br>mol·L <sup>-1</sup> )            | 1                                                           | 20                              | 9.81                            | 8                                    | 1.5                                | 160/6 |
| 34<br>0.1%              | Gd 0.999<br>Eu 0.02 (0.05<br>mol·L <sup>-1</sup> )          | 0                                                           | 20                              | 10.981                          | 8                                    | 1.5                                | 160/6 |
| 35<br>0.5%              | Gd 0.995<br>Eu 0.1 (0.05<br>mol·L <sup>-1</sup> )           | 0                                                           | 20                              | 10.905                          | 8                                    | 1.5                                | 160/6 |
| 36<br>1%                | Gd 0.99<br>Eu 0.2 (0.05<br>mol·L <sup>-1</sup> )            | 0                                                           | 20                              | 10.81                           | 8                                    | 1.5                                | 160/6 |
| 37<br>5%                | Gd 0.95<br>Eu 0.05                                          | 0                                                           | 20                              | 11                              | 8                                    | 1.5                                | 160/6 |
| 38<br>5%                | Gd 0.95<br>Eu 0.05                                          | 0.4                                                         | 20                              | 10.6                            | 8                                    | 1.5                                | 160/6 |
| 39<br>5%                | Gd 0.95<br>Eu 0.05                                          | 0.8                                                         | 20                              | 10.2                            | 8                                    | 1.5                                | 160/6 |
| 40<br>1%                | Gd 0.99<br>Eu 0.2 (0.05<br>mol·L <sup>-1</sup> )            | 0.4                                                         | 20                              | 10.41                           | 8                                    | 1.5                                | 160/6 |
| 41<br>1%                | Gd 0.99<br>Eu 0.2 (0.05<br>mol·L <sup>-1</sup> )            | 0.8                                                         | 20                              | 10.01                           | 8                                    | 1.5                                | 160/6 |

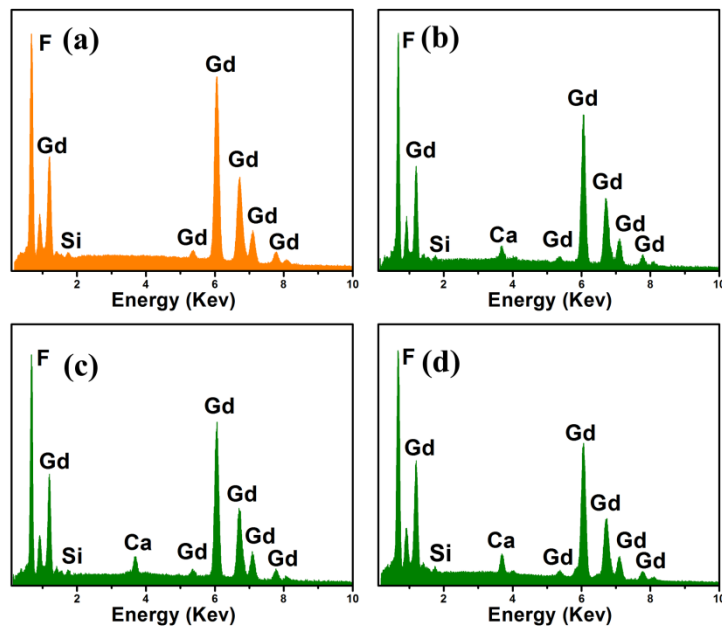

**Fig. S1** EDS spectra of samples prepared with different amount of  $\text{CaCl}_2$ : (a) 0.2 mmol, (b) 0.4 mmol, (c) 0.8 mmol, (d) 1 mmol.

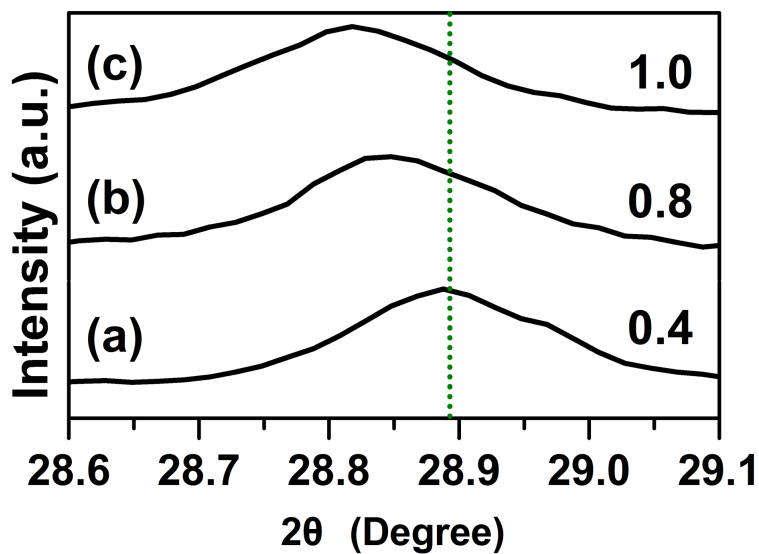

**Fig. S2** Partial enlarged detail of XRD patterns of samples obtained with different amount of  $\text{CaCl}_2$ : (a) 0.4 mmol, (b) 0.8 mmol, (c) 1.0 mmol.

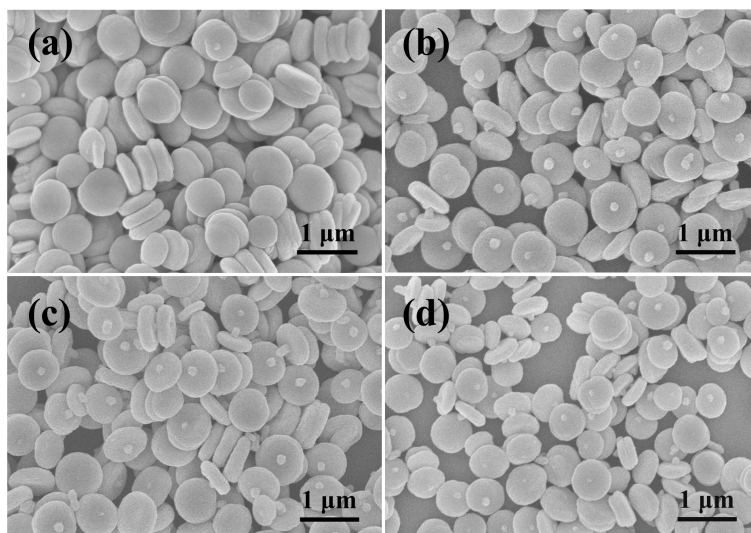

**Fig. S3** SEM images of samples prepared with different temperature: (a) 120 °C, (b) 140 °C, (c) 180 °C, (d) 200 °C.

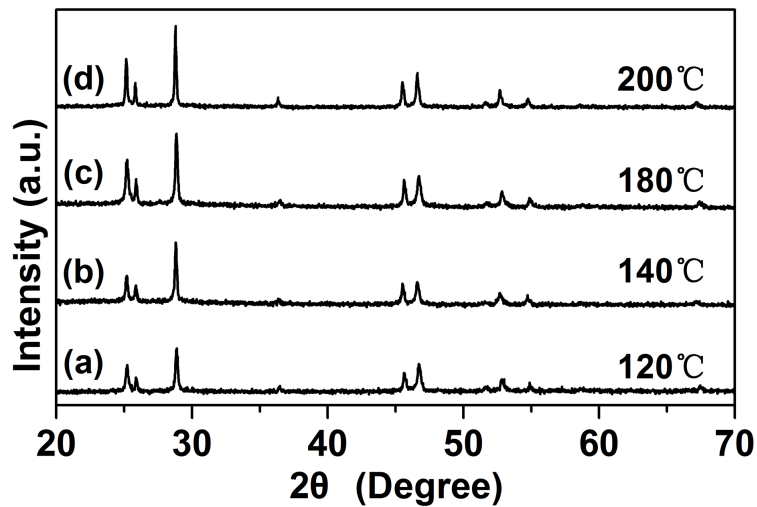

**Fig. S4** XRD patterns of samples prepared with different temperature: (a) 120 °C, (b) 140 °C, (c) 180 °C, (d) 200 °C.

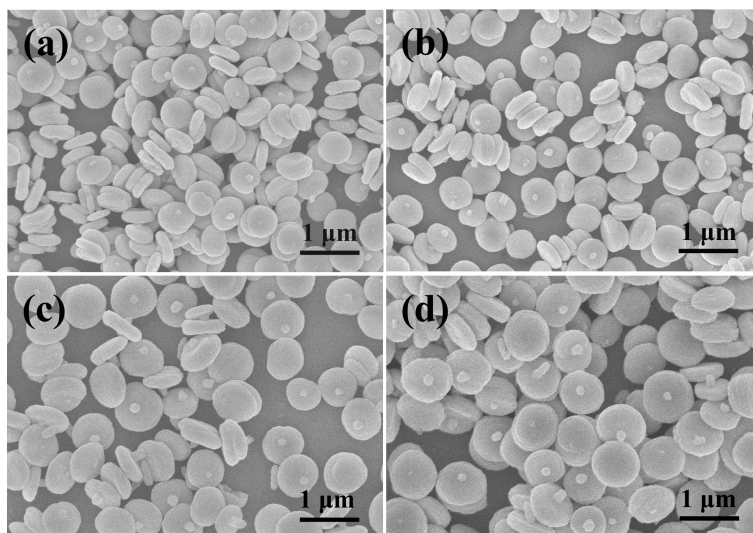

**Fig. S5** SEM images of samples prepared with different reaction time: (a) 0.5 h, (b) 2 h, (c) 8 h, (d) 24 h.

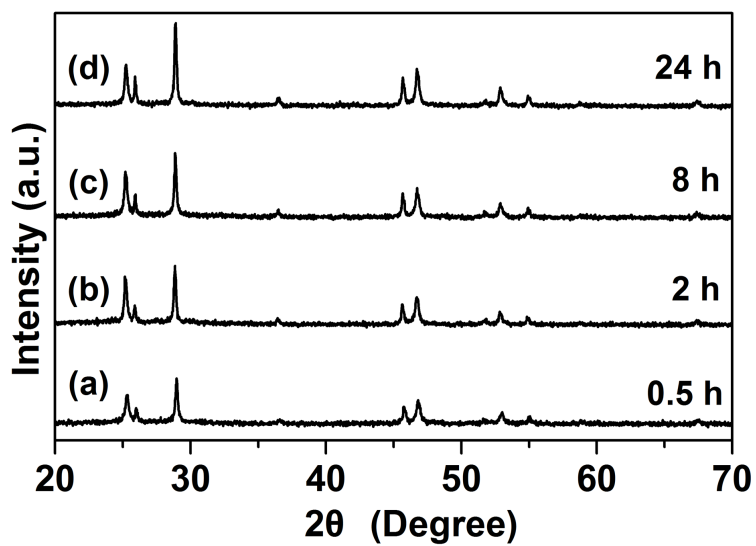

**Fig. S6** XRD patterns of samples prepared with different reaction time: (a) 0.5 h, (b) 2 h, (c) 8 h, (d) 24 h

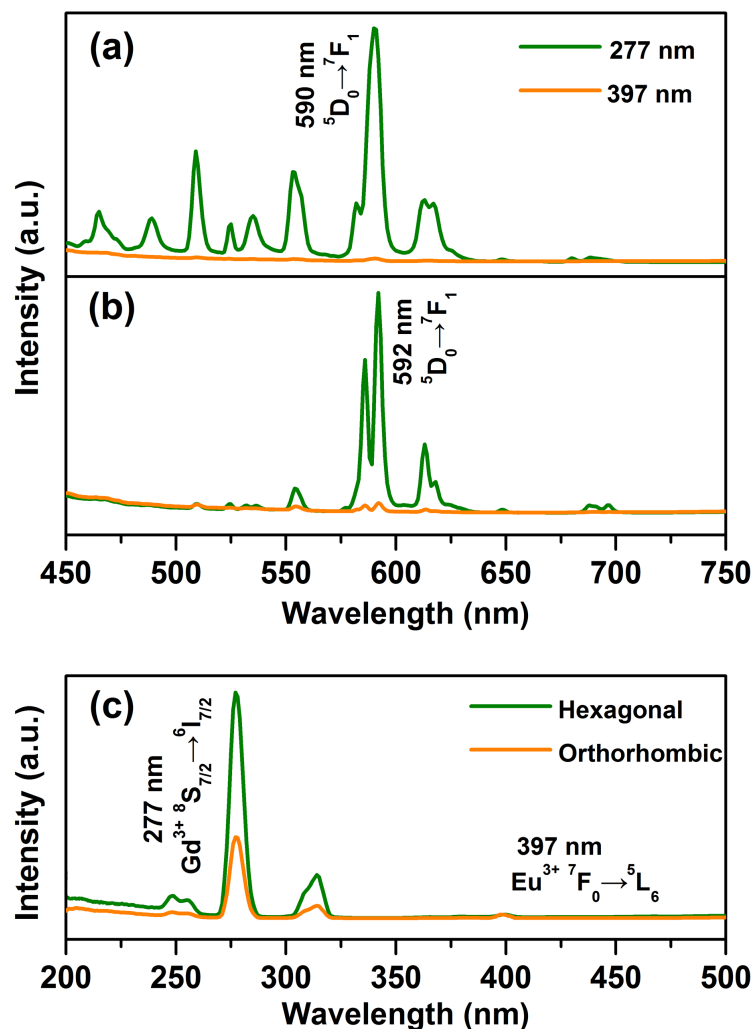

**Fig. S7** Emission spectra of (a) hexagonal  $\text{Gd}_{1-y}\text{Ca}_y\text{F}_{3-y}$ : 0.1 mol%  $\text{Eu}^{3+}$  and orthorhombic (b)  $\text{GdF}_3:\text{Eu}^{3+}$  excited at 272 nm and 396 nm. (c) Excitation spectra of hexagonal and orthorhombic samples monitored at 590 and 592 nm, respectively.

$$I_{277/397}^{\text{H}} = 62.10$$

$$I_{277/397}^{\text{O}} = 20.44$$

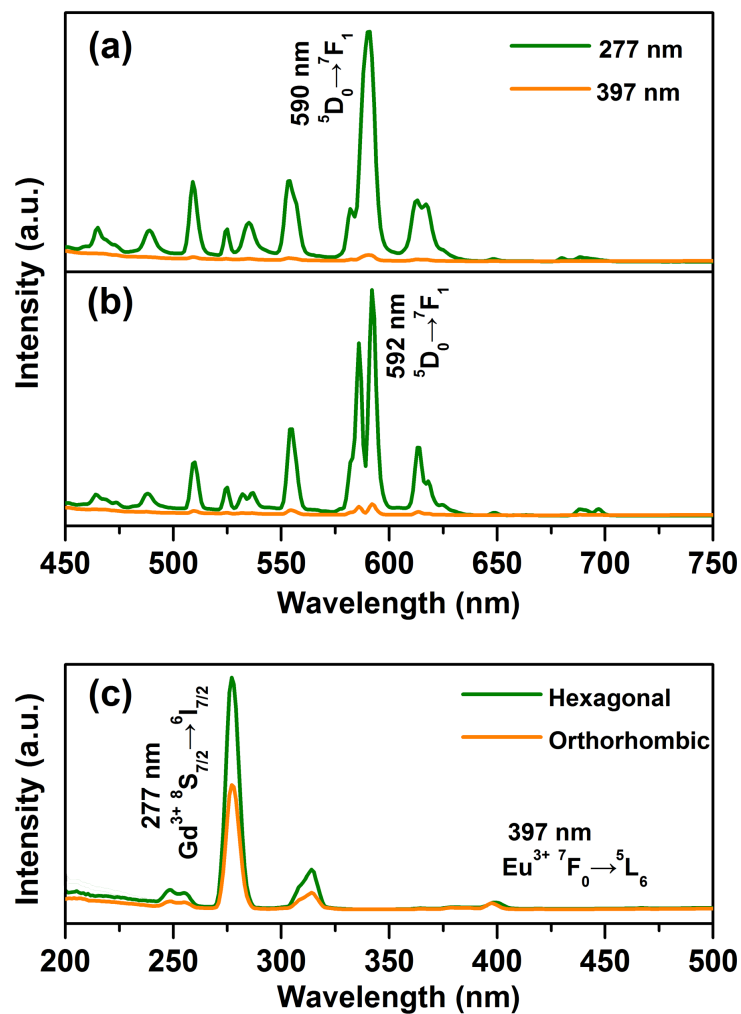

**Fig. S8** Emission spectra of (a) hexagonal  $\text{Gd}_{1-y}\text{Ca}_y\text{F}_{3-y}$ : 0.5 mol%  $\text{Eu}^{3+}$  and orthorhombic (b)  $\text{GdF}_3:\text{Eu}^{3+}$  excited at 272 nm and 396 nm. (c) Excitation spectra of hexagonal and orthorhombic samples monitored at 590 and 592 nm, respectively.

$$I_{277/397}^{\text{H}} = 35.51$$

$$I_{277/397}^{\text{O}} = 18.86$$



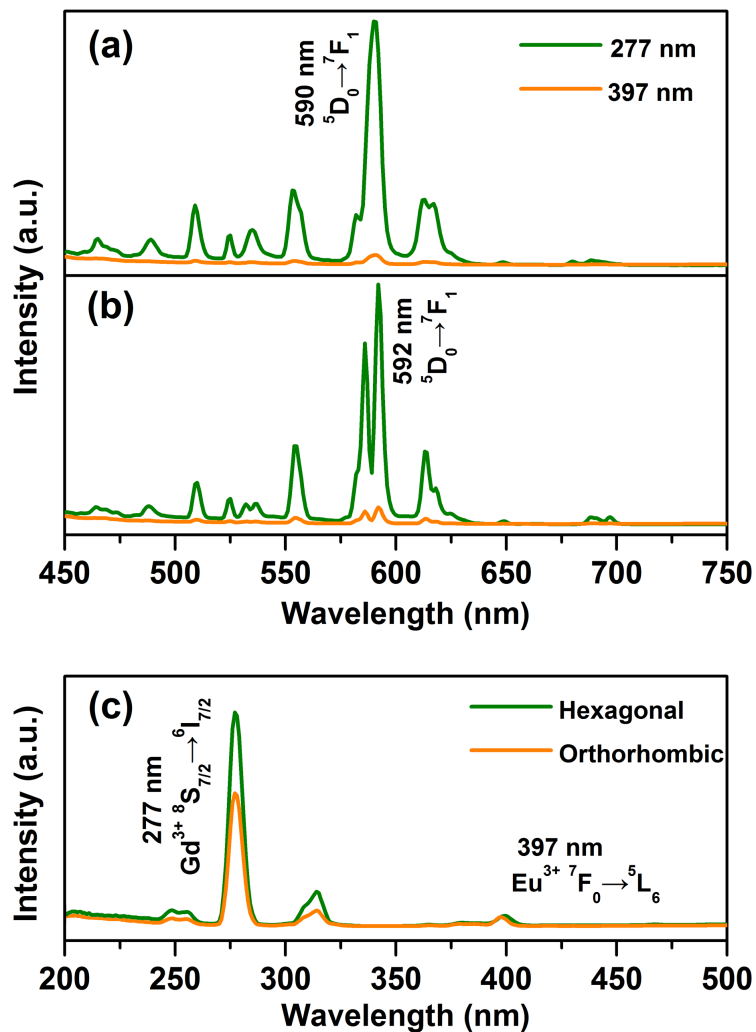

**Fig. S9** Emission spectra of (a) hexagonal  $\text{Gd}_{1-y}\text{Ca}_y\text{F}_{3-y}$ : 1 mol%  $\text{Eu}^{3+}$  and orthorhombic (b)  $\text{GdF}_3:\text{Eu}^{3+}$  excited at 272 nm and 396 nm. (c) Excitation spectra of hexagonal and orthorhombic samples monitored at 590 and 592 nm, respectively.

$$I_{277/397}^{\text{H}} = 23.98$$

$$I_{277/397}^{\text{O}} = 13.77$$
